# Supplementary material for: Network Pharmacology and Comparative Transcriptome Reveals Biotargets and Mechanisms of Curcumol Treating Lung Adenocarcinoma Patients With COVID-19
Source: Front Nutr. 2022 Apr 19;9:870370. doi: 10.3389/fnut.2022.870370 (PMC9063984; doi:10.3389/fnut.2022.870370)
Supplement: Supplementary file 3 [file Data_Sheet_3.XLSX]

## Sheet: Sheet1
ID	Description	classification	GeneRatio	BgRatio	pvalue	p.adjust	qvalue	geneID	Count
hsa04110	Cell cycle	cycle/proliferation	6/7	124/8111	7.81991e-11	9.95576e-10	5.23987e-11	CDK1/CCNB1/CCNB2/CCNE1/CCNE2/TTK	6
hsa04114	Oocyte meiosis	cycle/proliferation	6/7	129/8111	9.95576e-11	9.95576e-10	5.23987e-11	AURKA/CDK1/CCNB1/CCNB2/CCNE1/CCNE2	6
hsa04218	Cellular senescence	cycle/proliferation	5/7	156/8111	5.02699e-08	2.51349e-07	1.32289e-08	CDK1/CCNB1/CCNB2/CCNE1/CCNE2	5
hsa04914	Progesterone-mediated oocyte maturation	cycle/proliferation	4/7	100/8111	7.40162e-07	2.96065e-06	1.55824e-07	AURKA/CDK1/CCNB1/CCNB2	4
hsa05203	Viral carcinogenesis	cancer/disease	3/7	204/8111	0.000509258	0.00156788	8.25199e-05	CDK1/CCNE1/CCNE2	3
hsa05222	Small cell lung cancer	cancer/disease	2/7	92/8111	0.00257545	0.00571743	0.000300918	CCNE1/CCNE2	2
hsa05215	Prostate cancer	cancer/disease	2/7	97/8111	0.00285872	0.00571743	0.000300918	CCNE1/CCNE2	2
hsa05162	Measles	cancer/disease	2/7	139/8111	0.00578745	0.00964576	0.000507671	CCNE1/CCNE2	2
hsa05226	Gastric cancer	cancer/disease	2/7	149/8111	0.00662591	0.0101937	0.000536511	CCNE1/CCNE2	2
hsa04934	Cushing syndrome	cancer/disease	2/7	155/8111	0.00715439	0.0102206	0.000537924	CCNE1/CCNE2	2
hsa05161	Hepatitis B	cancer/disease	2/7	162/8111	0.00779477	0.010393	0.000547001	CCNE1/CCNE2	2
hsa05169	Epstein-Barr virus infection	cancer/disease	2/7	202/8111	0.0119348	0.0149185	0.000785185	CCNE1/CCNE2	2
hsa05206	MicroRNAs in cancer	cancer/disease	2/7	310/8111	0.0269221	0.0316731	0.001667	CCNE1/CCNE2	2
hsa05165	Human papillomavirus infection	cancer/disease	2/7	331/8111	0.0304322	0.0338136	0.00177966	CCNE1/CCNE2	2
hsa05170	Human immunodeficiency virus 1 infection	immune response	3/7	212/8111	0.000570154	0.00156788	8.25199e-05	CDK1/CCNB1/CCNB2	3
hsa05166	Human T-cell leukemia virus 1 infection	immune response	3/7	219/8111	0.000627151	0.00156788	8.25199e-05	CCNB2/CCNE1/CCNE2	3
hsa04115	p53 signaling pathway	signaling	5/7	73/8111	1.06451e-09	7.09675e-09	3.73513e-10	CDK1/CCNB1/CCNB2/CCNE1/CCNE2	5
hsa04068	FoxO signaling pathway	signaling	2/7	131/8111	0.00515519	0.00937307	0.000493319	CCNB1/CCNB2	2
hsa04151	PI3K-Akt signaling pathway	signaling	2/7	354/8111	0.0344832	0.0362981	0.00191043	CCNE1/CCNE2	2
