# Supplementary material for: Network Pharmacology and Comparative Transcriptome Reveals Biotargets and Mechanisms of Curcumol Treating Lung Adenocarcinoma Patients With COVID-19
Source: Front Nutr. 2022 Apr 19;9:870370. doi: 10.3389/fnut.2022.870370 (PMC9063984; doi:10.3389/fnut.2022.870370)
Supplement: Supplementary file 5 [file Data_Sheet_5.XLSX]

## Sheet: BP0.05
Category	Term	Count	%	PValue	Genes
GOTERM_BP_DIRECT	GO:0006260~DNA replication	18	5.45455	6.51277e-10	RRM1, BLM, RFC4, RRM2, GINS3, GINS4, CDC6, TICRR, POLD3, CHAF1B, BRIP1, CDC45, ORC1, EXO1, CDK1, MCM5, DTL, MCM2
GOTERM_BP_DIRECT	GO:0007062~sister chromatid cohesion	15	4.54545	1.28125e-09	CDCA5, PMF1-BGLAP, CDCA8, BUB1B, KNL1, SKA1, ZWINT, AURKB, CENPK, NUF2, CENPL, KNTC1, KIF2C, CENPO, SPC25
GOTERM_BP_DIRECT	GO:0051301~cell division	25	7.57576	3.33612e-09	CDCA5, CDCA7L, CCDC124, NCAPG2, PMF1-BGLAP, CDCA7, NCAPG, CDCA8, BUB1B, NCAPH, SKA1, SMC2, TUBA1A, NUF2, KNTC1, SPAG5, VRK1, CDC6, KNL1, MASTL, ZWINT, CDK1, MCM5, KIF2C, SPC25
GOTERM_BP_DIRECT	GO:0007067~mitotic nuclear division	18	5.45455	7.02513e-07	CDCA5, NCAPG2, PMF1-BGLAP, BUB1B, VRK1, KNL1, CDC6, MASTL, SKA1, AURKB, KIF15, CIT, NUF2, PBK, CDK1, KNTC1, KIF2C, SPC25
GOTERM_BP_DIRECT	GO:0034501~protein localization to kinetochore	5	1.51515	1.34808e-05	CDK1, BUB1B, TTK, KNL1, AURKB
GOTERM_BP_DIRECT	GO:0000731~DNA synthesis involved in DNA repair	7	2.12121	1.94875e-05	POLD3, RAD51AP1, BLM, BRIP1, EXO1, XRCC2, BRCA2
GOTERM_BP_DIRECT	GO:0000082~G1/S transition of mitotic cell cycle	10	3.0303	4.38216e-05	RRM2, CDC45, ORC1, CDCA5, CDK1, MCM5, INHBA, CDC6, IQGAP3, MCM2
GOTERM_BP_DIRECT	GO:0000732~strand displacement	6	1.81818	5.53951e-05	RAD51AP1, BLM, BRIP1, EXO1, XRCC2, BRCA2
GOTERM_BP_DIRECT	GO:0006271~DNA strand elongation involved in DNA replication	5	1.51515	8.21524e-05	POLD3, GINS1, RFC4, GINS3, GINS4
GOTERM_BP_DIRECT	GO:0007076~mitotic chromosome condensation	5	1.51515	8.21524e-05	CDCA5, NUSAP1, NCAPG, NCAPH, SMC2
GOTERM_BP_DIRECT	GO:0006281~DNA repair	14	4.24242	0.000133684	FANCI, POLQ, BLM, SLX1B, XRCC2, FAAP24, GTF2H4, TICRR, RAD51AP1, CHAF1B, EXO1, CDK1, SLX1A, RAD18
GOTERM_BP_DIRECT	GO:0006270~DNA replication initiation	6	1.81818	0.000156547	CDC45, ORC1, GINS4, MCM5, CDC6, MCM2
GOTERM_BP_DIRECT	GO:0000083~regulation of transcription involved in G1/S transition of mitotic cell cycle	5	1.51515	0.000480857	RRM2, CDC45, ORC1, CDK1, CDC6
GOTERM_BP_DIRECT	GO:0010941~regulation of cell death	4	1.21212	0.000643479	JUND, JUNB, HSPA1B, HSPA1A
GOTERM_BP_DIRECT	GO:0030206~chondroitin sulfate biosynthetic process	5	1.51515	0.000669548	CHST7, CHPF, CHST12, CSPG4, CHST13
GOTERM_BP_DIRECT	GO:0032508~DNA duplex unwinding	6	1.81818	0.000719813	GINS1, BLM, BRIP1, CDC45, GINS4, MCM5
GOTERM_BP_DIRECT	GO:0001833~inner cell mass cell proliferation	4	1.21212	0.000847649	GINS1, GINS4, NCAPG2, BRCA2
GOTERM_BP_DIRECT	GO:0000724~double-strand break repair via homologous recombination	7	2.12121	0.00130822	RAD51AP1, POLQ, BLM, SLX1B, XRCC2, SLX1A, BRCA2
GOTERM_BP_DIRECT	GO:0008283~cell proliferation	15	4.54545	0.0028403	STIL, EMP1, BUB1B, SCRIB, EMP2, MIF, MKI67, DNPH1, AURKB, KIF15, IL1A, CDK1, CSPG4, KIF2C, BOK
GOTERM_BP_DIRECT	GO:0000122~negative regulation of transcription from RNA polymerase II promoter	23	6.9697	0.00363469	JUND, MYPOP, ZBTB14, HDAC10, VDR, SUV39H1, ARX, FZD8, NR0B1, VAX2, NPAS1, AURKB, NR2F6, ZEB2, SOX17, ID1, ZNF219, ANKRD1, MSX1, ZBTB7A, JUNB, ZFPM1, E2F7
GOTERM_BP_DIRECT	GO:0006351~transcription, DNA-templated	48	14.5455	0.00411228	ZNF771, CEBPB, CEBPD, HDAC10, CDCA7L, SUV39H1, ARX, CDCA7, LIN9, NPAS1, ZNF709, CHAF1B, TAF1B, CCDC85B, ZNF503, ZNF502, ZNF524, ZNF865, ZNF787, ZNF688, ZNF467, ZBTB7A, E2F7, MNX1, HES4, MYPOP, ZNF680, ZNF580, ZBTB14, VDR, IRX3, IRF2BP1, NR1D2, NR0B1, RFX1, EBF4, VAX2, KLF2, NR2F6, ZEB2, LBX2, ID1, ZNF74, ZNF219, BCL3, DEPDC1, ZNF579, ZFPM1
GOTERM_BP_DIRECT	GO:0007130~synaptonemal complex assembly	4	1.21212	0.00459755	SYCE1L, STAG3, MEIOC, TEX12
GOTERM_BP_DIRECT	GO:0007059~chromosome segregation	6	1.81818	0.00503395	TOP2A, SPAG5, NUF2, PMF1-BGLAP, SKA1, SPC25
GOTERM_BP_DIRECT	GO:0051983~regulation of chromosome segregation	3	0.909091	0.00696131	KIF2C, MKI67, AURKB
GOTERM_BP_DIRECT	GO:0071230~cellular response to amino acid stimulus	5	1.51515	0.00713367	COL1A1, COL3A1, CEBPB, SOCS1, COL1A2
GOTERM_BP_DIRECT	GO:0006974~cellular response to DNA damage stimulus	10	3.0303	0.0072622	TOP2A, POLQ, BLM, SUV39H1, BCL3, MASTL, ALKBH7, DTL, WDR76, RAD18
GOTERM_BP_DIRECT	GO:0036297~interstrand cross-link repair	5	1.51515	0.00826224	RAD51AP1, FANCI, SLX1B, FAAP24, SLX1A
GOTERM_BP_DIRECT	GO:0007049~cell cycle	10	3.0303	0.00945404	JAG2, MRPL41, CHAF1B, POC5, SUV39H1, CCDC124, LIN9, RNF103-CHMP3, AURKB, MCM2
GOTERM_BP_DIRECT	GO:0010628~positive regulation of gene expression	11	3.33333	0.0111005	IL1A, ZNF580, VDR, ID1, ARX, CDK1, INHBA, AMH, IQGAP3, HSPA1B, HSPA1A
GOTERM_BP_DIRECT	GO:0007052~mitotic spindle organization	4	1.21212	0.0126018	STIL, STMN1, TTK, SPC25
GOTERM_BP_DIRECT	GO:0007093~mitotic cell cycle checkpoint	4	1.21212	0.0150329	BUB1B, KNTC1, TTK, ZWINT
GOTERM_BP_DIRECT	GO:0009612~response to mechanical stimulus	5	1.51515	0.0156461	COL3A1, ENDOG, JUND, CCL2, JUNB
GOTERM_BP_DIRECT	GO:0051726~regulation of cell cycle	7	2.12121	0.0161189	JUND, MYBL2, LIN9, MASTL, GAS2L1, DTL, JUNB
GOTERM_BP_DIRECT	GO:0045892~negative regulation of transcription, DNA-templated	16	4.84848	0.0173569	CEBPB, ZBTB14, CEBPD, HDAC10, VDR, SUV39H1, NR1D2, NR0B1, CCDC85B, ID1, ZNF219, BCL3, DEPDC1, MAP3K10, ZBTB7A, PITX1
GOTERM_BP_DIRECT	GO:0045995~regulation of embryonic development	3	0.909091	0.0183781	SOX17, CDK1, PHLDA2
GOTERM_BP_DIRECT	GO:0042769~DNA damage response, detection of DNA damage	4	1.21212	0.0206358	POLD3, RFC4, DTL, RAD18
GOTERM_BP_DIRECT	GO:0032467~positive regulation of cytokinesis	4	1.21212	0.022192	KIF23, CDC6, AURKB, CIT
GOTERM_BP_DIRECT	GO:0034605~cellular response to heat	4	1.21212	0.022192	IL1A, MKI67, HSPA1B, HSPA1A
GOTERM_BP_DIRECT	GO:0006302~double-strand break repair	5	1.51515	0.0226943	POLQ, BRIP1, CDCA5, MEIOC, BRCA2
GOTERM_BP_DIRECT	GO:0030330~DNA damage response, signal transduction by p53 class mediator	3	0.909091	0.0242164	BCL3, MIF, E2F7
GOTERM_BP_DIRECT	GO:0007095~mitotic G2 DNA damage checkpoint	3	0.909091	0.0242164	FANCI, BLM, CDK1
GOTERM_BP_DIRECT	GO:0001501~skeletal system development	7	2.12121	0.0249637	JAG2, COL1A1, COL3A1, COL1A2, VDR, PITX1, DLL3
GOTERM_BP_DIRECT	GO:0000086~G2/M transition of mitotic cell cycle	7	2.12121	0.0249637	PLK4, TUBA1A, CEP135, CDK1, FBXL15, MASTL, CIT
GOTERM_BP_DIRECT	GO:0007051~spindle organization	3	0.909091	0.0273822	SPAG5, TTK, AURKB
GOTERM_BP_DIRECT	GO:1902380~positive regulation of endoribonuclease activity	2	0.606061	0.0323693	HSPA1B, HSPA1A
GOTERM_BP_DIRECT	GO:1904722~positive regulation of mRNA endonucleolytic cleavage involved in unfolded protein response	2	0.606061	0.0323693	HSPA1B, HSPA1A
GOTERM_BP_DIRECT	GO:0034080~CENP-A containing nucleosome assembly	4	1.21212	0.0328348	CENPK, CENPL, CENPO, KNL1
GOTERM_BP_DIRECT	GO:0006915~apoptotic process	16	4.84848	0.0457335	DDIAS, TRADD, CDCA7, NME3, BUB1B, MRPL41, IL1A, TMEM102, CDK1, BCAP29, MAP3K10, SCAND1, PHLDA2, RNF103-CHMP3, MCM2, BOK
GOTERM_BP_DIRECT	GO:0070434~positive regulation of nucleotide-binding oligomerization domain containing 2 signaling pathway	2	0.606061	0.0481603	HSPA1B, HSPA1A
GOTERM_BP_DIRECT	GO:0009263~deoxyribonucleotide biosynthetic process	2	0.606061	0.0481603	RRM1, RRM2
GOTERM_BP_DIRECT	GO:0010165~response to X-ray	3	0.909091	0.0494577	BLM, XRCC2, BRCA2
